# Supplementary material
Source: PubMed Central journal article supplement (PMC4160109)
Supplement: NIHMS606914-supplement.pdf [file NIHMS606914-supplement.pdf]

## SUPPLEMENTARY MATERIAL

### Methods

#### *Pharmacokinetics*

Samples were centrifuged at 1000g at 4°C for 10min, and plasma was stored at -80°C until analysis. Rigosertib plasma concentrations were determined using a validated LC-MS-MS method, as described previously with modifications (46). PK parameters were calculated from rigosertib concentration-time data using standard non-compartmental methods as implemented in WinNonlin (Pharsight Corp., Cary, NC). The area under the plasma concentration-time curve (AUC) value was calculated to the last quantifiable sample ( $AUC_{last}$ ) by use of the linear trapezoidal rule. The AUC values were extrapolated to infinity ( $AUC_{\infty}$ ) by dividing the last quantifiable concentration by the terminal disposition rate constant ( $\lambda_z$ ), which was determined from the slope of the terminal phase of the concentration-time profile. The terminal half-life ( $T_{1/2}$ ) was calculated as 0.693 divided by  $\lambda_z$ . A t-test was used for the comparison of parameters on days 1 and 21 of the first cycle and day 15 of the second cycle. The *a priori* level of significance was  $p < 0.05$ . Statistical analyses were performed using SPSS version 10.0 (SPSS Inc, Chicago, IL).

Sample concentrations in human urine were measured by a validated LC-MS/MS method with a calibration range of 25.0 to 37500 ng/mL for ON 01910 and 1.00 to 1500 ng/mL for ON 01500. Urine samples (100  $\mu$ L) were extracted by acetonitrile protein precipitation and then separated by BDS C18 column (HyperClone, 5  $\mu$ m, 100 x 2.0 mm) under gradient elution. Sciex API-4000 LC/MS/MS system (Applied Biosystems) was operated in positive mode with multiple reaction monitoring (MRM) using ion transitions at m/z as follows: ON 01910: 452>194; ON 01500:394>136 and internal standard Temazepam: 301>255.

Bioavailability studies were carried out in a parallel phase 1 trial for patients with MDS and were not performed here (Komrokji *et al*, submitted).

#### *SNaPshot® Assay*

The Colorado Molecular Correlates (CMOCO) Laboratory SNaPshot® panel tests for 68 discrete mutational loci, 8 of which have been validated for treatment guidance in non-small cell lung carcinoma. Briefly, after nucleic acid is extracted, target regions of the 15 tested genes are PCR amplified with multiplex primer sets. After phosphatase and exonuclease treatment to remove unincorporated dNTS and primers, the PCR products are then used as a template for labeled single base extension using matched probe sets. The resulting SNaPshot® products are analyzed by capillary electrophoresis and examined for the presence of mutations. Determination of the presence or absence of mutation is carried out by manual evaluation of the data through GeneMapper® software (Applied Biosystems), using parameters defined in the CMOCO laboratory.

#### *Exome sequencing*

On average 161 million 100 bp paired-end reads were obtained per sample at an average coverage of 75x (Supplemental Table 6). Due to an error in the sequencing, the second read of each pair was trimmed to 70bp. The reads were mapped against the human genome (hg19) using Bowtie2 (version 2.0.5)(47). On average 98% of the reads aligned to the human genome one or more times and on average 80% of the reads aligned exactly once. Reads aligning to multiple locations or with a mapping quality score less than 30 were excluded from the analysis. Variants were identified using Samtools/Bcftools (version 0.1.18) and filtered according to the following criteria. Variants were excluded if the total depth was less than 20, the total depth was more than 2000, had fewer

than 5 alternate bases, variant quality score less than 20, or if the alternate base was not found on both strands (e.g. strand specific)(48). Common variants were excluded by comparing the variants obtained by Exome-seq to the variants found in a previous RNA-seq study.(33) Variants common to more than 70% of the samples were not of interest to this study. The potential impact of each variant on protein function was inferred using PolyPhen2 (49). Variants predicted to be damaging were used in the subsequent analysis.

## SUPPLEMENTAL FIGURE LEGENDS

**Figure 1. Pharmacokinetics of oral rigosertib.** Following a single oral dose of rigosertib, the plasma concentration-time profile exhibited a rapid distribution phase followed by a slower elimination phase. Rigosertib  $C_{\max}$  and  $AUC_{0-\infty}$  were linear and dose-proportional over the dose range of 70-700mg (right hand panels).  $C_{\max}$  was significantly lower at steady-state on day 21 than on day 1.

**Figure 1.**

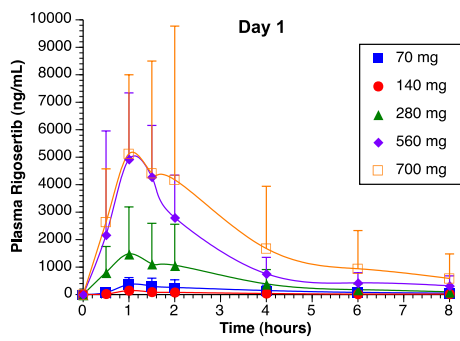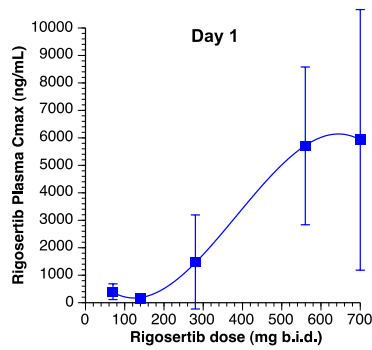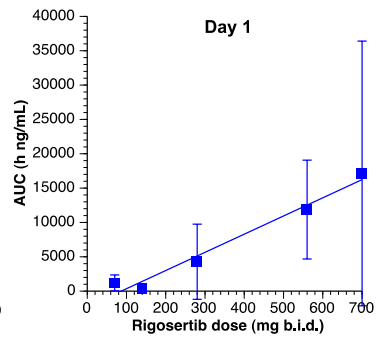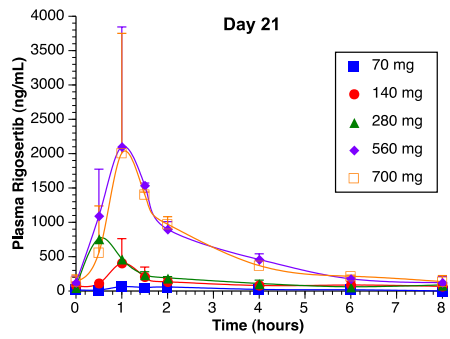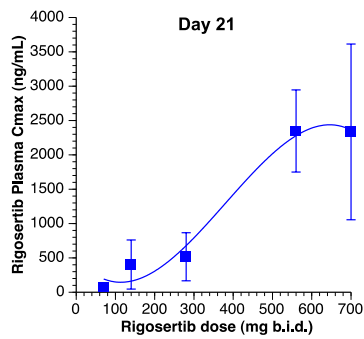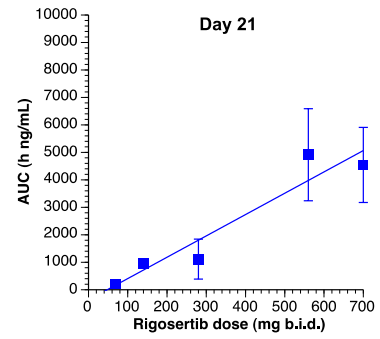

**SUPPLEMENTAL TABLES**

**Table 1.** Patient characteristics and treatment responses

|          | <b>PID</b> | <b>Dose</b> | <b>Sex</b> | <b>Age</b> | <b>Tumor type</b>             | <b>TOS</b>       | <b>Best response</b> | <b>DOR</b> |
|----------|------------|-------------|------------|------------|-------------------------------|------------------|----------------------|------------|
| <b>D</b> | 1          | 70          | M          | 56         | Transitional cell carcinoma   | 4                | PD                   |            |
| <b>O</b> | 3          | 70          | F          | 49         | Ovarian carcinoma             | 42               | SD                   | 36         |
| <b>S</b> | 4          | 70          | F          | 81         | Ovarian carcinoma             | 18               | SD                   | 12         |
| <b>E</b> | 5          | 140         | F          | 62         | Pancreatic neuroendocrine     | 30               | SD                   | 24         |
|          | 6          | 140         | F          | 57         | Vulvovaginal melanoma         | 12               | PD                   |            |
| <b>E</b> | 8          | 280         | F          | 57         | Carcinoid tumor               | 25               | SD                   | 20         |
| <b>S</b> | 9          | 280         | M          | 59         | Salivary gland carcinoma      | 1                | NE                   |            |
| <b>C</b> | 10         | 280         | M          | 50         | HNSCC                         | 101 <sup>+</sup> | CR                   | 96+        |
| <b>A</b> | 11         | 560         | M          | 61         | Hepatocellular carcinoma      | 6                | PD                   |            |
| <b>L</b> | 12         | 560         | F          | 50         | Adenoid cystic nasopharyngeal | 27               | SD                   | 22         |
| <b>A</b> | 13         | 560         | F          | 63         | Colorectal carcinoma          | 6                | PD                   |            |
| <b>T</b> | 14         | 700         | M          | 53         | Renal cell carcinoma          | 6                | PD                   |            |
| <b>I</b> | 16         | 700         | M          | 71         | Renal cell carcinoma          | 29               | SD                   | 23         |
| <b>O</b> | 17         | 700/560     | M          | 60         | HNSCC                         | 11               | PD                   |            |
| <b>N</b> | 18         | 700/560     | M          | 63         | GIST                          | 5                | PD                   |            |
|          | 19         | 700/560     | M          | 51         | Renal cell carcinoma          | 6                | PD                   |            |
|          | 21*        | 700         | F          | 60         | Breast carcinoma              | 1                | NE                   |            |
|          | 22         | 700/560     | M          | 46         | HNSCC                         | 12               | PD                   |            |

|          |    |                 |   |    |                           |    |    |    |
|----------|----|-----------------|---|----|---------------------------|----|----|----|
|          | 24 | 560             | M | 72 | Esophageal adenocarcinoma | 8  | PD |    |
| <b>E</b> | 26 | 560             | M | 57 | Esophageal adenocarcinoma | 6  | PD |    |
| <b>X</b> | 27 | 560             | F | 72 | Uterine carcinosarcoma    | 6  | PD |    |
| <b>P</b> | 28 | 560/280/1<br>40 | F | 63 | Ovarian carcinoma         | 10 | PD |    |
| <b>A</b> | 30 | 560             | F | 45 | Breast carcinoma          | 3  | PD |    |
| <b>N</b> | 31 | 560             | M | 39 | Craniopharyngioma         | 18 | SD | 12 |
| <b>S</b> | 32 | 560             | F | 54 | Adrenocortical carcinoma  | 4  | PD |    |
| <b>I</b> | 33 | 560             | F | 68 | Colorectal carcinoma      | 12 | PD |    |
| <b>O</b> | 34 | 560             | F | 40 | Cervical adenocarcinoma   | 5  | PD |    |
| <b>N</b> | 35 | 560             | M | 54 | HNSCC                     | 50 | PR | 40 |
|          | 36 | 560             | M | 60 | Esophageal adenocarcinoma | 4  | PD |    |
| <b>C</b> | 37 | 560             | M | 64 | Colorectal carcinoma      | 10 | PD |    |
| <b>O</b> | 38 | 560             | M | 50 | Colorectal carcinoma      | 6  | PD |    |
| <b>H</b> | 39 | 560             | F | 69 | Uterine adenocarcinoma    | 6  | PD |    |
| <b>O</b> | 40 | 560             | M | 69 | Esophageal adenocarcinoma | 6  | PD |    |
| <b>R</b> | 41 | 560             | F | 63 | SCC of the vulva          | 12 | PD |    |
| <b>T</b> | 43 | 560             | M | 47 | HNSCC                     | 10 | PD |    |
|          | 44 | 560             | F | 64 | Colorectal carcinoma      | 5  | PD |    |
|          | 45 | 560             | F | 54 | Ovarian carcinoma         | 5  | PD |    |
|          | 46 | 560             | F | 77 | Hepatocellular carcinoma  | 22 | SD | 15 |
|          | 47 | 560             | F | 68 | HNSCC                     | 5  | PD |    |
|          | 48 | 560             | M | 74 | Colorectal carcinoma      | 5  | PD |    |

|  |    |     |   |    |                      |   |    |  |
|--|----|-----|---|----|----------------------|---|----|--|
|  | 50 | 560 | F | 65 | Colorectal carcinoma | 6 | PD |  |
|  | 51 | 560 | M | 28 | Colorectal carcinoma | 6 | PD |  |
|  | 52 | 560 | M | 79 | Leiomyosarcoma       | 5 | PD |  |
|  | 53 | 560 | M | 56 | Colorectal carcinoma | 6 | PD |  |
|  | 54 | 560 | M | 58 | Prostate carcinoma   | 5 | PD |  |
|  | 55 | 560 | F | 56 | Lung SCC             | 8 | PD |  |
|  | 56 | 560 | F | 49 | Colorectal carcinoma | 7 | PD |  |
|  | 57 | 560 | F | 20 | Osteosarcoma         | 6 | PD |  |

\*This patient was taken off study 2 days after treatment initiation because of PD, and replaced with a seventh patient in the 700mg cohort. Abbreviations: PID: Patient identifier; TOS: Time on study (weeks); PR: Partial response; SD: Stable disease; PD: Progressive disease; DOR: Duration of response (weeks).



**Table 2.** Grade  $\geq 2$  adverse events possibly, probably or definitely related to rigosertib treatment

| <b>PID</b> | <b>Dose (mg BID)</b> | <b>Grade</b> | <b>Toxicity</b>       | <b>Onset (week)</b> | <b>Hold</b> | <b>Reduce</b> |
|------------|----------------------|--------------|-----------------------|---------------------|-------------|---------------|
| 01-03      | 70                   | 2            | Hematuria             | 42                  | No          | No            |
|            |                      | 3            | Pelvic pain           | 42                  | No          | No            |
| 01-05      | 140                  | 2            | Cystitis              | 22                  | No          | Yes           |
|            |                      | 2            | Micturition urgency   | 22                  | No          | No            |
| 01-12      | 560                  | 2            | Dysuria               | 8                   | No          | No            |
| 01-13      | 560                  | 2            | Hypertonic bladder    | 5                   | No          | No            |
| 01-14      | 700                  | 2            | Dysuria               | 1                   | No          | No            |
|            |                      | 2            | Hematuria             | 3                   | Yes         | Yes           |
|            |                      | 3            | Hyponatremia          | 6                   | No          | No            |
| 01-16      | 700                  | 2            | Dysuria               | 26                  | Yes         | Yes           |
|            |                      | 2            | Abdominal discomfort  | 3                   | Yes         | No            |
|            |                      | 2            | Abdominal distension  | 3                   | Yes         | No            |
|            |                      | 2            | Nausea                | 4                   | Yes         | No            |
|            |                      | 2            | Micturition urgency   | 26                  | Yes         | Yes           |
|            |                      | 2            | Micturition frequency | 26                  | Yes         | Yes           |
| 01-17      | 700                  | 2            | Abdominal pain        | 2                   | No          | Yes           |
| 01-18      | 700                  | 2            | Dysuria               | 1                   | Yes         | Yes           |
|            |                      | 3            | Hematuria*            | 2                   | Yes         | Yes           |
| 01-19      | 700                  | 2            | Micturition urgency   | 1                   | Yes         | Yes           |
|            |                      | 2            | Dysuria               | 1                   | Yes         | Yes           |
| 01-27      | 560                  | 2            | Cystitis              | 3                   | Yes         | No            |

|       |     |   |                       |    |     |        |
|-------|-----|---|-----------------------|----|-----|--------|
| 01-28 | 560 | 2 | Dysuria               | 4  | Yes | No     |
|       |     | 2 | Pelvic pain           | 5  | No  | No     |
|       |     | 3 | Dysuria               | 6  | Yes | Yes    |
|       |     | 2 | Cystitis              | 4  | No  | Yes    |
| 01-32 | 560 | 3 | Dysuria**             | 3  | Yes | No     |
|       |     | 3 | Hematuria**           | 3  | Yes | No     |
| 01-35 | 560 | 2 | Dysuria               | 14 | Yes | No     |
| 01-37 | 560 | 2 | Dysuria               | 6  | No  | Yes    |
| 01-38 | 560 | 2 | Dysuria               | 3  | Yes | No     |
| 01-40 | 560 | 2 | Dysuria               | 4  | Yes | Yes*** |
| 01-45 | 560 | 2 | Dysuria               | 6  | No  | No     |
| 01-46 | 560 | 2 | Dysuria               | 12 | No  | Yes    |
| 01-47 | 560 | 2 | Urinary hesitancy     | 2  | No  | Yes    |
|       |     | 3 | Fatigue               | 3  | No  | Yes    |
|       |     | 2 | Fatigue               | 4  | No  | No     |
| 01-50 | 560 | 2 | Dysuria               | 5  | No  | No     |
| 01-51 | 560 | 2 | Dysuria               | 2  | Yes | Yes    |
| 01-53 | 560 | 2 | Dysuria               | 4  | Yes | Yes*** |
| 01-54 | 560 | 2 | Dysuria               | 2  | Yes | No     |
|       |     | 2 | Micturition frequency | 2  | Yes | No     |
|       |     | 2 | Micturition urgency   | 2  | Yes | No     |
| 01-56 | 560 | 2 | Dysuria               | 2  | Yes | No     |
|       |     | 2 | Cystitis              | 2  | Yes | No     |

\*: DLT (Grade 3 hematuria week 2); \*\*: DLT (Grade 3 hematuria and dysuria week 3); \*\*\*:

Treatment discontinued because of toxicity.

**Table 3.** Serious Adverse Events

| <b>PID</b> | <b>Dose (mg)</b> | <b>Grade</b> | <b>Serious Adverse Event</b>         | <b>Relationship to rigosertib</b> |
|------------|------------------|--------------|--------------------------------------|-----------------------------------|
| 01-01      | 70               | 3            | Bile duct obstruction                | None (disease progression)        |
| 01-01      | 70               | 2            | Alanine aminotransferase increased   | None (disease progression)        |
| 01-01      | 70               | 2            | Aspartate aminotransferase increased | None (disease progression)        |
| 01-01      | 70               | 3            | Pain                                 | None (disease progression)        |
| 01-02      | 70               | 3            | Bilateral pulmonary embolism         | None (disease progression)        |
|            |                  |              |                                      |                                   |
| 01-06      | 140              | 3            | Abdominal pain and dehydration       | None (disease progression)        |
|            |                  |              |                                      |                                   |
| 01-09      | 280              | 5            | Pleural effusion                     | None (disease progression)        |
|            |                  |              |                                      |                                   |
| 01-24      | 560              | 3            | Pneumonia                            | None                              |
| 01-24      | 560              | 3            | Sepsis                               | None                              |
| 01-27      | 560              | 3            | Pyelonephritis                       | None                              |
| 01-27      | 560              | 5            | Death                                | None (disease progression)        |
| 01-30      | 560              | 3            | Nausea                               | None                              |
| 01-30      | 560              | 3            | Small intestinal obstruction         | None (disease progression)        |
| 01-32      | 560              | 3            | Dyspnea                              | None (disease progression)        |
| 01-34      | 560              | 3            | Hepatic hemorrhage                   | None (disease progression)        |
| 01-39      | 560              | 3            | Rectal hemorrhage                    | None                              |
| 01-52      | 560              | 3            | Weakness                             | Possible                          |
| 01-52      | 560              | 3            | Pancreatitis                         | None                              |

| 01-18 | 700 | 3 | Abdominal pain, Dehydration | None (disease progression) |
|-------|-----|---|-----------------------------|----------------------------|
| 01-18 | 700 | 5 | Death                       | None (disease progression) |
| 01-21 | 700 | 3 | Renal failure               | None (disease progression) |

**Table 4.** Summary of mutations and gene copy number changes

| <b>PID</b> | <b>Site</b>    | <b>TP53</b> | <b>PIK3CA</b> | <b>KRAS</b> | <b>NRAS</b> | <b>Other</b> | <b>PTEN<br/>copy#</b> | <b>PIK3C<br/>A<br/>copy#</b> |
|------------|----------------|-------------|---------------|-------------|-------------|--------------|-----------------------|------------------------------|
| 3          | Ovarian        |             | 34G>T         |             |             |              |                       |                              |
| 8          | Carcinoid      |             |               |             |             |              |                       |                              |
| 10         | HNSCC          | 743G>A      |               |             |             |              | LLG                   | HLG                          |
| 11         | Hepatocellular |             |               |             |             |              |                       |                              |
| 12         | Adenoid cystic |             |               |             |             |              |                       |                              |
| 14         | Renal cell     |             |               |             |             |              |                       |                              |
| 17         | HNSCC          |             |               |             |             |              | HLL                   | HLG                          |
| 19         | Renal cell*    |             |               |             |             |              |                       |                              |
| 21         | Breast         |             | 3140G><br>A   |             |             |              |                       |                              |
| 24         | Esophageal     |             |               |             |             |              |                       |                              |
| 26         | Esophageal     |             |               |             |             |              |                       |                              |
| 27         | Uterine        |             | 1637A>C       |             |             |              |                       |                              |
| 28         | Ovarian        |             |               |             |             |              |                       |                              |
| 30         | Breast         |             |               |             |             |              |                       |                              |
| 32         | Adrenocortical |             |               |             |             |              |                       |                              |

|    |            |        |             |       |            |                           |     |     |
|----|------------|--------|-------------|-------|------------|---------------------------|-----|-----|
| 33 | Colorectal | 733G>A |             |       | 34G>T      | <i>APC</i><br>4666<br>ins |     |     |
| 35 | HNSCC      |        |             |       | 181C><br>A |                           | HLL | D   |
| 36 | Esophageal |        |             |       |            |                           |     |     |
| 37 | Colorectal |        |             |       |            |                           |     |     |
| 39 | Uterine    |        | 3140A><br>G |       |            |                           |     |     |
| 40 | Esophageal |        |             |       |            |                           |     |     |
| 41 | SCC vulva  |        |             |       |            |                           |     |     |
| 43 | HNSCC      |        |             |       |            | <i>AKT</i><br>49G>A       | D   | LLL |
| 44 | Colorectal | 524G>A |             |       |            |                           |     |     |
| 45 | Ovarian    |        |             | 35G>A |            |                           |     |     |
| 48 | Colorectal |        | 1633G><br>A | 35G>A |            |                           |     |     |
| 50 | Colorectal |        |             | 34G>A |            |                           |     |     |
| 51 | Colorectal |        | 1624G><br>A | 35G>A |            |                           |     |     |
| 53 | Colorectal |        |             | 35G>A |            |                           |     |     |
| 55 | Lung SCC   | 524G>A |             |       |            |                           | D   | HLG |

\*: Tissue sample rejected. Gene copy number analysis by FISH was performed only on 5 SCC

samples: HLG: High level copy number gain; HLL: High level copy number loss; LLG: Low level

copy number loss; LLL: Low level copy number loss; D: Disomy



**Table 5.** Validated exome variants seen exclusively in sensitive and resistant squamous cell carcinomas.

| Gene                                                                                     | Description                                             | Chromosome | Position  | Nucleotide change | Amino acid change |
|------------------------------------------------------------------------------------------|---------------------------------------------------------|------------|-----------|-------------------|-------------------|
| Non-synonymous SNPs present in both sensitive tumors but in none of the resistant tumors |                                                         |            |           |                   |                   |
| <i>A2ML1</i>                                                                             | Alpha-2-macroglobulin-like 1                            | 12         | 9009820   | G>A               | R1122W            |
| <i>ABCC11</i>                                                                            | ATP-binding cassette, subfamily C (CFTR/MRP), member 11 | 16         | 48242379  | G>A               | T546M             |
| <i>ABCC11</i>                                                                            | ATP-binding cassette, subfamily C (CFTR/MRP), member 11 | 16         | 48204078  | T>A               | N1277Y            |
| <i>ACIN1</i>                                                                             | Apoptotic chromatin condensation inducer 1              | 14         | 23564437  | T>C               | N20S              |
| <i>FAT1</i>                                                                              | FAT tumor suppressor homolog 1 (Drosophila)             | 4          | 187630590 | G>A               | A131V             |
| <i>FREM1</i>                                                                             | FRAS1 related extracellular matrix 1                    | 9          | 14819370  | G>T               | S803Y             |
| <i>KIAA1683</i>                                                                          | KIAA1683                                                | 19         | 18376518  | T>A               | Q611L             |
| <i>ROBO3</i>                                                                             | Roundabout, axon                                        | 11         | 12474236  | G>A               |                   |

|                                                                                                |                                                |    |               |     |        |
|------------------------------------------------------------------------------------------------|------------------------------------------------|----|---------------|-----|--------|
|                                                                                                | guidance receptor,<br>homolog 3 (Drosophila)   |    | 5             |     | R416H  |
| <i>ROS1</i>                                                                                    | C-ros oncogene 1, receptor<br>tyrosine kinase  | 6  | 11772544<br>8 | T>A | T145P  |
| <i>SLC26A8</i>                                                                                 | Solute carrier family 26,<br>member 8          | 15 | 85448875      | C>A | I148V  |
| <i>TIGD2</i>                                                                                   | Tigger transposable<br>element derived 2       | 4  | 90035549      | A>G | H475R  |
| <i>ZC3H4</i>                                                                                   | Zinc finger CCCH-type<br>containing 4          | 19 | 47570343      | G>A | A1061V |
| Non-synonymous SNPs present in all resistant tumors but in neither of the two sensitive tumors |                                                |    |               |     |        |
| <i>A2ML1</i>                                                                                   | Alpha-2-macroglobulin-<br>like 1               | 12 | 9013755       | C>T | C970Y  |
| <i>ADAMTSL1</i>                                                                                | ADAMTS-like 1                                  | 9  | 18777196      | A>C | E990A  |
| <i>CDH23</i>                                                                                   | Cadherin-related 23                            | 10 | 73492079      | A>G | N1351D |
| <i>HCLS1</i>                                                                                   | Hematopoietic cell-specific<br>Lyn substrate 1 | 3  | 12135133<br>8 | C>T | E361K  |
| <i>PDE4C</i>                                                                                   | Phosphodiesterase 4C,<br>cAMP-specific         | 19 | 18329784      | C>T | R344Q  |

**Table 6.** Exome Sequencing Coverage

| <b>PID</b> | <b>Number of Reads</b> | <b>Aligned one or more times</b> | <b>Aligned once</b> | <b>Mean Fold Coverage</b> |
|------------|------------------------|----------------------------------|---------------------|---------------------------|
| 01-10      | 216,099,716            | 98.10%                           | 79.20%              | 88 x                      |
| 01-17      | 225,139,870            | 98.80%                           | 81.80%              | 92 x                      |
| 01-22      | 172,639,390            | 97.20%                           | 79.60%              | 79 x                      |
| 01-35      | 244,163,170            | 97.70%                           | 77.70%              | 95 x                      |
| 01-43      | 18,433,134             | 96%                              | 76.70%              | 33 x                      |
| 01-55      | 91,803,484             | 98.80%                           | 83.90%              | 61 x                      |
